# Supplementary material
Source: Springer Nature journal article supplement (https://www.springermedizin.de/resource/supplementary/12875_2006_234_MOESM1_ESM.pdf/9436562)
Supplement: MOESM1 [file 9436562]

**MEDLINE**

MeSH Heading=(Depression OR Depressive Disorder, Major OR Depressive Disorder OR Topic=depress\*) AND MeSH Heading=(Family Practice OR Physicians, Family or Primary Health Care OR Topic=general practice\*) AND MeSH Heading=(Longitudinal Studies OR Cohort Studies OR Follow-up Studies)

**CINAHL**

(Heading "Depression") and ((Heading "Family Practice") OR (Heading "Physicians, Family) OR (Heading "Primary Health Care")) AND (Heading "Prospective Studies")<sup>1</sup>

**PsycINFO**

Descriptor=(major depression or depression emotion or depression or depressive disorder\* or depress\*) AND Descriptor=(general practitioners or family medicine or family physicians or primary health care)

Methodology was limited to Followup Study or Longitudinal Study or Prospective Study

1 In CINAHL Prospective Studies is used for: Cohort Studies; Follow-up Studies; Incidence Studies and Longitudinal Studies
